# Supplementary material for: Spontaneous and site-specific immobilization of PNGase F via spy chemistry
Source: Royal Society of Chemistry journal article supplement (doi:10.1039/d3ra04591a), 2023-01-01
Supplement: d3ra04591a1.pdf [file d3ra04591a1.pdf]

## Electronic Supplementary Information

### Spontaneous and site-specific immobilization of PNGase F via spy chemistry

Liang Zhang<sup>1,\*</sup>, Wenhui Wang<sup>2,\*</sup>, Yueqin Yang<sup>3</sup>, Xiang Liu<sup>2,4</sup>, Wenjie Zhu<sup>2</sup>, Lingrui Pi<sup>2</sup>, Xin Liu<sup>2,\*\*</sup> and Song Wang<sup>1,\*\*</sup>

*<sup>1</sup>Hubei Superior Discipline Group of Exercise and Brain Science from Hubei Provincial, Wuhan Sports University, Wuhan, 430079, China*

*<sup>2</sup>Hubei Bioinformatics & Molecular Imaging Key Laboratory, Systems Biology Theme, Department of Biomedical Engineering, College of Life Science and Technology, Huazhong University of Science and Technology, Wuhan, 430074, China*

*<sup>3</sup>Exercise Immunology Center, Wuhan Sports University, Wuhan, 430079, China*

*<sup>4</sup>Department of Laboratory Medicine, Wuhan Children's Hospital, Tongji Medical College, Huazhong University of Science and Technology, Wuhan 430016. China*

---

\* These authors contributed equally to this work.

\*\* Corresponding author

Dr. Xin Liu, Department of Biomedical Engineering, College of Life Science and Technology, Huazhong University of Science and Technology, Wuhan 430074, China

Email: xliu@mail.hust.edu.cn      Tel: +86-27-87792203

Dr. Song Wang, Hubei Superior Discipline Group of Exercise and Brain Science from Hubei Provincial, Wuhan Sports University, Wuhan, 430079, China. Email:

wangsong@whsu.edu.cn

Table S1. The primers sequence

| Primers No. | Sequences                                          |
|-------------|----------------------------------------------------|
| S-F         | 5'- GTGCCGCGCGGCAGCCATATGATGGCAATGGTTGATACCCTGA-3' |
| S-R         | 5'- CTGTCCACCAGTCATGCTAGCGCTACCCCCGCCACCGCT-3'     |

Table S2. Particle size distributions and zeta potential changes in the reaction procedure. (samples measured were very dilute in DI H<sub>2</sub>O @ 25 ° C for DLS measurements. For all experiments, *n* = 3.)

| MNP        | Hydrodynamic diameter (nm) | Zeta potential (mV) |
|------------|----------------------------|---------------------|
| Bare MNP   | 552.5 ± 8.3                | 9.8 ± 0.8           |
| MNP@COOH   | 848.8 ± 77.6               | -22.1 ± 0.6         |
| MNP@SpyTag | 987.9 ± 62.7               | -0.2 ± 0.2          |

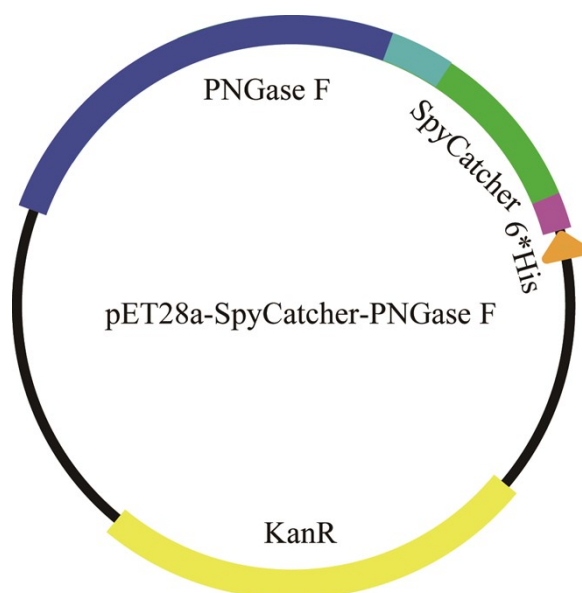

Figure S1. Gene design for pET28a-spycatcher-PNGase F.

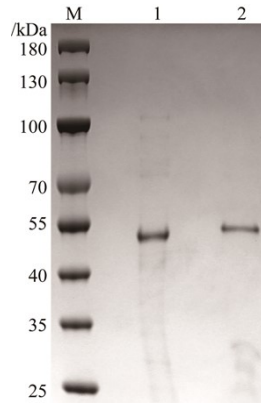

Figure S2. SDS-PAGE analysis of the SpyCatcher-PNGase F and SpyCatcher-PNGase F incubation with SpyTag. Lanes 1: SpyCatcher-PNGase F; Lanes 2: SpyCatcher-PNGase F incubation with SpyTag in mild condition.

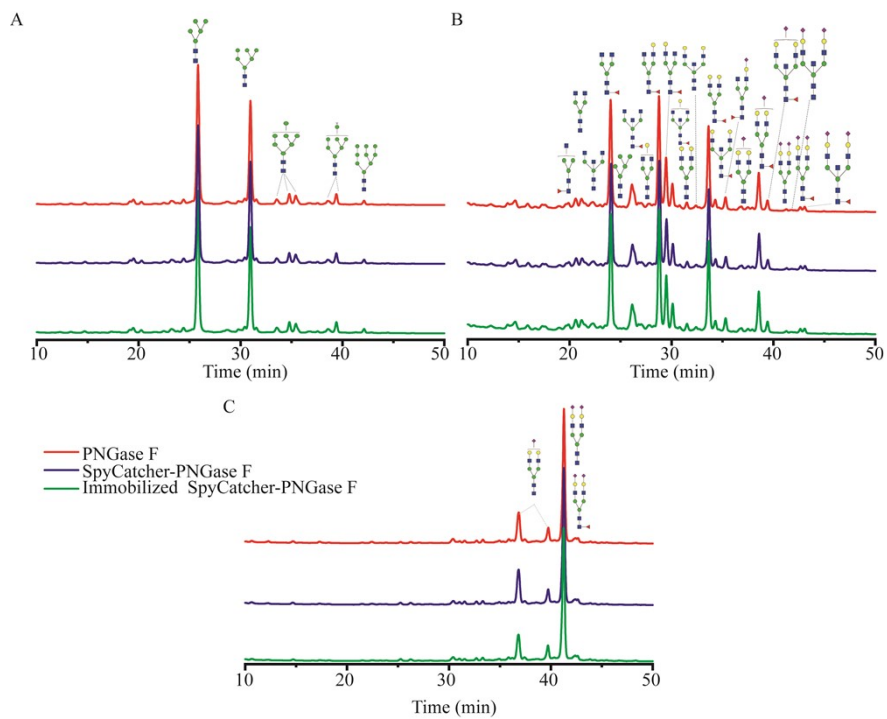

Figure S3. Representative Ultra Performance Liquid Chromatography (UPLC) chromatogram of RNase B (A), IgG (B), and transferrin (C) N-glycan profiles. N-acetyl glucosamine (HexNAc), blue ■; fucose (DeoxyHex), red ▼, mannose (Hex), green ●; galactose (Hex), yellow ●, and sialic acid (Neu5Ac), purple
